# Supplementary material for: Microwave-assisted preparation and photocatalytic properties of Zn2GeO4 nanorod bundles
Source: Royal Society of Chemistry journal article supplement (doi:10.1039/b927170h), 2010-01-01
Supplement: b927170h.pdf [file b927170h.pdf]

## Supporting information

### Microwave-assisted Preparation and Photocatalytic Property of $\text{Zn}_2\text{GeO}_4$ Nanorod Bundles

Lei Zhang,<sup>a</sup> Xiao-Feng Cao,<sup>a</sup> Ying-Li Ma,<sup>a</sup> Xue-Tai Chen\*<sup>a</sup> and Zi-Ling Xue<sup>b</sup>

<sup>a</sup> State Key Laboratory of Coordination Chemistry, Nanjing National Laboratory of Microstructures, School of Chemistry and Chemical Engineering, Nanjing University, Nanjing 210093, P. R. China E-mail: [xtchen@netra.nju.edu.cn](mailto:xtchen@netra.nju.edu.cn); Fax: +86-25-83314502.

<sup>b</sup> Department of Chemistry, The University of Tennessee, Knoxville, Tennessee 37996-1600, USA

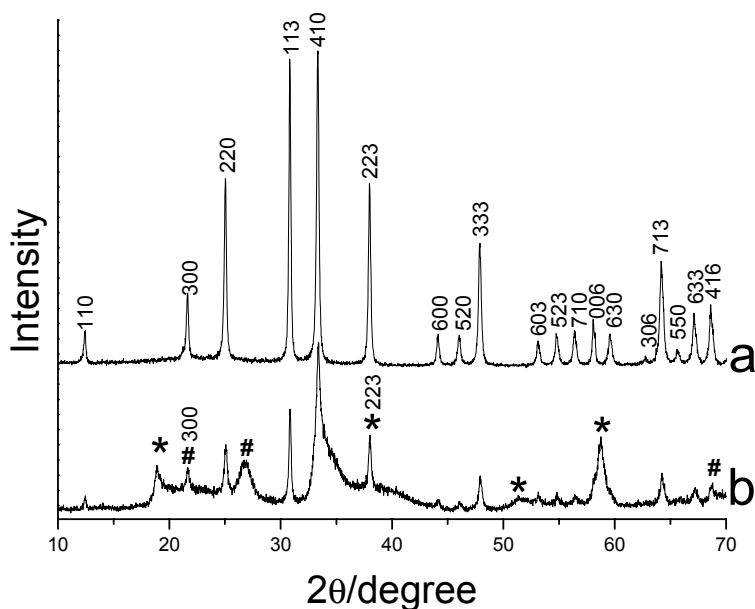

Figure S1 XRD patterns of the products at different reaction temperatures: (a) 190 °C and (b) 140 °C. (\*:  $\text{Zn}(\text{OH})_2$  72-2032 and #:  $\text{GeO}_2$ : 83-0548)

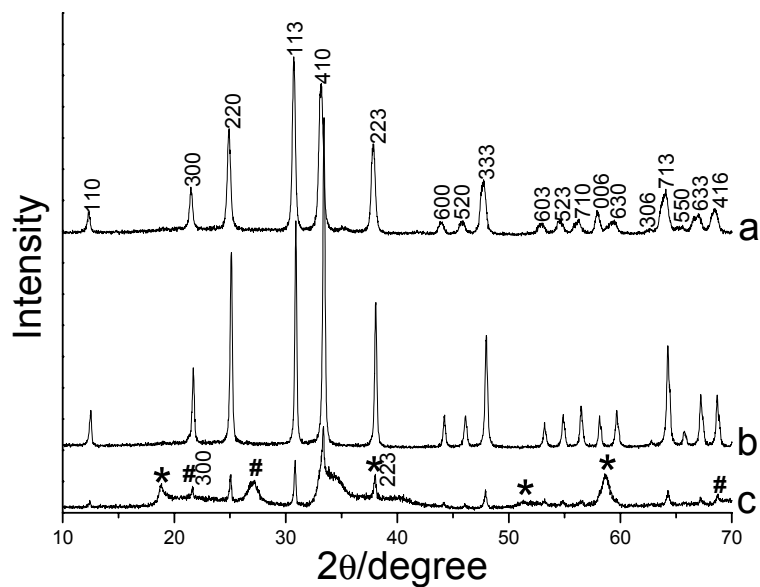

Figure S2 The XRD patterns of the products with different volume of En: (a) 0 mL, (b) 0.5 mL and (c) 2 mL. (\*:  $\text{Zn}(\text{OH})_2$  72-2032 and #:  $\text{GeO}_2$ : 83-0548)

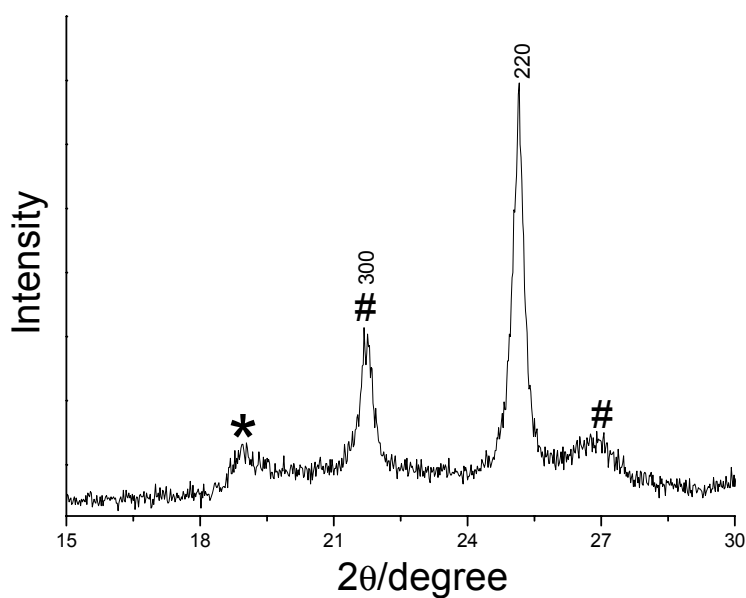

Figure S3 A local enlargement XRD patterns indicated in Figure 7a. (\*:  $\text{Zn}(\text{OH})_2$  72-2032 and #:  $\text{GeO}_2$ : 83-0548).

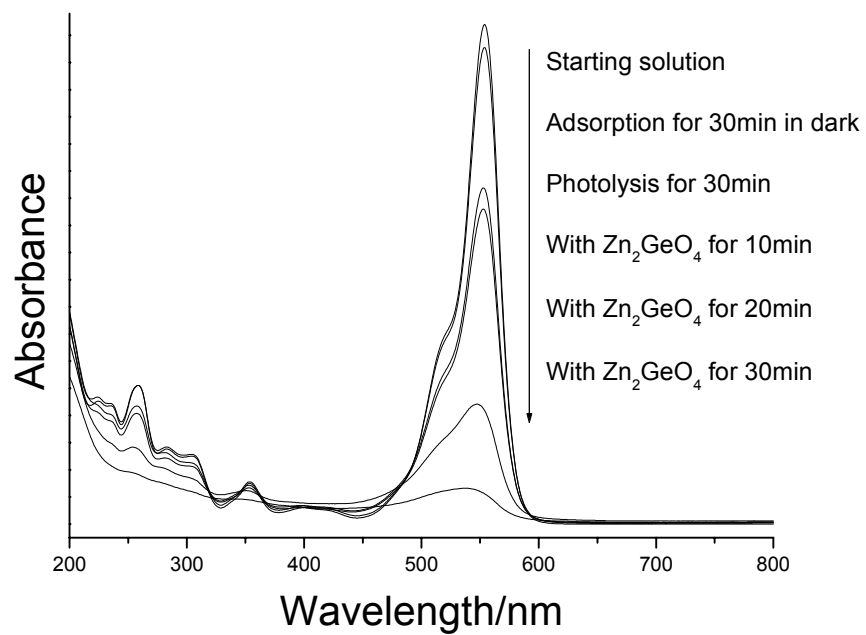

Figure S4 Absorption spectra of the RhB solution in the presence of Zn<sub>2</sub>GeO<sub>4</sub> nanobundles under exposure to UV light.
